# Supplementary material
Source: PubMed Central journal article supplement (PMC2984525)
Supplement: supp_kfq280_toxsci-10-0497-File002.pdf [file supp_kfq280_toxsci-10-0497-File002.pdf]

**Supplemental Material:**

**TABLE 2**

List of oligonucleotide probes generated for use in bDNA signal amplification assay

| Target Sequence <sup>a</sup> | Function <sup>b</sup> | Probe Sequence                                    |
|------------------------------|-----------------------|---------------------------------------------------|
| Sat1 (NM_174870)             |                       |                                                   |
| 689-710                      | CE                    | agcatgtgtttgcctgagaagTTTTTctcttgaaagaaagt         |
| 730-748                      | CE                    | ccatgcctagccctggtgTTTTTctcttgaaagaaagt            |
| 833-851                      | CE                    | tccttagctgccagcagcaTTTTTctcttgaaagaaagt           |
| 875-895                      | CE                    | tgggtattggcaccttcagacTTTTTctcttgaaagaaagt         |
| 621-645                      | LE                    | tggttgtagagataggtagacacgTTTTTtaggcataggaccctgtct  |
| 646-666                      | LE                    | catagcaaagccatcgagcagTTTTTtaggcataggaccctgtct     |
| 711-729                      | LE                    | ccgagggatctgcacaccTTTTTtaggcataggaccctgtct        |
| 749-769                      | LE                    | agctcaaccatgtgtggaccaTTTTTtaggcataggaccctgtct     |
| 770-789                      | LE                    | ctgtcccacattctgcagcaTTTTTtaggcataggaccctgtct      |
| 852-874                      | LE                    | ggtgtcggtagcgatctgagagtTTTTTtaggcataggaccctgtct   |
| 896-920                      | LE                    | gccaccacaataacaaataactctgTTTTTtaggcataggaccctgtct |
| 921-942                      | LE                    | tccaaaatgggacacaattgtgTTTTTtaggcataggaccctgtct    |
| 667-688                      | BL                    | tcaagatggtcacagaagctcc                            |
| 790-812                      | BL                    | gtgaccacatcacatatgtggc                            |
| 813-832                      | BL                    | ctctaggcacagggcactg                               |
| Svct1 (NM_011397)            |                       |                                                   |
| 635-654                      | CE                    | ccaatgagagccagctcggTTTTTctcttgaaagaaagt           |
| 742-763                      | CE                    | ggaagagagttagaccctgccTTTTTctcttgaaagaaagt         |
| 874-892                      | CE                    | cagttcgagcctggaagccTTTTTctcttgaaagaaagt           |
| 911-931                      | CE                    | ggatccagggagagatagccaTTTTTctcttgaaagaaagt         |
| 675-698                      | LE                    | tgggagaacaagactatcaggagaTTTTTtaggcataggaccctgtct  |
| 699-719                      | LE                    | aaggtgaggtgctgcagatacTTTTTtaggcataggaccctgtct     |
| 720-741                      | LE                    | ccatcggtaaacaggtaacaggTTTTTtaggcataggaccctgtct    |
| 790-810                      | LE                    | ggtcatgatggccagcacaatTTTTTtaggcataggaccctgtct     |
| 811-831                      | LE                    | cacgtagcagagcagccacacTTTTTtaggcataggaccctgtct     |
| 832-853                      | LE                    | gcagcacatctgcagggtaaTTTTTtaggcataggaccctgtct      |
| 854-873                      | LE                    | atagactgtgggtctgcggTTTTTtaggcataggaccctgtct       |
| 893-910                      | LE                    | tgatgtcccctcgggcatTTTTTtaggcataggaccctgtct        |
| 932-954                      | LE                    | ccactgacatggataggggattcTTTTTtaggcataggaccctgtct   |
| 655-674                      | BL                    | atggagcaagccgaaatacc                              |
| 764-789                      | BL                    | cgaaacatctaaagatctggactc                          |

CE, capture extender; LE, label extender; BL, blocker.

<sup>a</sup> Target sequence refers to the region of the mRNA transcript to which a given probe is complementary. GenBank accession numbers for each transcript are given in parentheses next to the gene name.

<sup>b</sup> Function refers to the type of bDNA oligonucleotide probe represented by each sequence.
